# Supplementary material
Source: publisher figshare collection journal article supplement (https://acs.figshare.com/ndownloader/files/10224948)
Supplement: Supplementary file 1 [file 10224948]

65
Coordinates from ORCA-job 1_NiCOC_bpy_opt1
  Ni  7.93136992755604      7.54725624055406      3.20377599430999
  N   7.34746493877191      9.69021807040315      5.05604312630568
  N   9.42793092485076      9.68915949134798      4.42424985063963
  N   7.59445050841161      6.10676385543472      1.95709699722694
  C   9.24732009517056     10.86051248423577      5.15943711604266
  C   7.74912857943285      4.87302347230649      2.49281090489648
  C   9.58162021614065     12.93147585223815      6.25005593444158
  C   10.66209539501722      9.31749869218258      3.73133672926733
  C   7.90807097585546     10.86102898880544      5.56712217037692
  C   7.37758936859721     11.89383508991389      6.32919358657181
  C   5.93347342247815      9.32666538489381      5.15543647586092
  C   7.25911428071907      6.22693694471845      0.66775692819047
  C   8.27147165538282      8.99864794264468      4.35916544368931
  C   8.24035703706254     12.93080645704256      6.66091936099143
  C   10.11249861497483     11.89383892415735      5.49406183810964
  C   7.06707242577372      5.12590423594372     -0.15009670525168
  C   5.05704614401237      9.94030449578225      4.06396527049113
  C   7.23025533134402      3.85816293800279      0.38861535387620
  C   7.57403459024286      3.73007510436241      1.72724414167848
  H   6.34447197481425     11.89908489389282      6.64654834847595
  H   7.86758731490472     13.75927022550438      7.24831398590033
  H   10.21857876744566     13.76050527794012      6.52781971844022
  H   11.14631971628195     11.89932614945804      5.17896998033260
  H   7.14277591270546      7.22907869916910      0.28430181927768
  H   6.79617423833290      5.27094464594886     -1.18572247277955
  H   7.09159594959599      2.97651772681866     -0.22192865927131
  H   7.70405009967600      2.75209007951972      2.16512685301836
  H   11.49251708987016      9.62587301679574      4.36368636897557
  H   10.68679852546044      8.22979797130244      3.66936983440393
  H   5.87285825830735      8.23886502243298      5.13045390899315
  H   5.58551533968712      9.65019185653444      6.13443659150521
  H   5.22077664361731     11.01887765149669      4.01052153490329
  H   4.01956575672104      9.79634116053345      4.37223842021008
  N   8.51483872865152      9.69038952824075      1.35139585384474
  N   6.43436414018294      9.68858380534977      1.98314352049693
  C   6.61453001962437     10.85997087091205      1.24787237387039
  C   6.27958343554299     12.93086629858029      0.15728583243319
  C   5.20029843314909      9.31649499453740      2.67601259267751
  C   7.95378675154219     10.86095205055338      0.84019647259700
  C   8.48394189836313     11.89394071310686      0.07814789704503
  C   9.92897012356909      9.32736561834747      1.25194669730573
  C   7.59110792962673      8.99854891554027      2.04835641628882
  C   7.62084788521249     12.93064260837265     -0.25356566123497
  C   5.74903148172082     11.89303946871637      0.91324879940872
  C   10.80514050171282      9.94141087268603      2.34339945328440
  H   9.51706896850821     11.89954384399667     -0.23916978259762
  H   7.99336214002186     13.75924393850527     -0.84092587589510
  H   5.64235865192153     13.75969792289031     -0.12045275168233
  H   4.71518362700229     11.89821895500721      1.22826501378209
  H   4.36978118869627      9.62462398954276      2.04366833421860
  H   5.17590806748922      8.22876844823161      2.73798908543903
  H   9.99002920521520      8.23957797923043      1.27705376947740
  H   10.27676447840639      9.65095677514037      0.27290843603826
  H   10.64085342738252     11.01991092934973      2.39668273370287
  H   11.84268894776295      9.79792684118824      2.03513905625165
  N   8.26766103220793      6.10649448717883      4.45046058371672
  C   8.11176177524893      4.87287433768036      3.91480813082525
  C   8.60333166196465      6.22633505836880      5.73975447563056
  C   8.79446676396444      5.12519185688684      6.55764127095032
  C   8.62991417650207      3.85757770822791      6.01901243864101
  C   8.28580277189062      3.72977720246286      4.68045433821473
  H   8.72068942571822      7.22838899852575      6.12315537849484
  H   9.06571485865104      5.27002000824662      7.59320252367323
  H   8.76783507683990      2.97580070427742      6.62953026184570
  H   8.15479840649255      2.75184922780103      4.24268358115486
